# Supplementary material for: Multiparameter mapping of relaxation (R1, R2*), proton density and magnetization transfer saturation at 3 T: A multicenter dual‐vendor reproducibility and repeatability study
Source: PubMed Central journal article supplement (PMC7502832; doi:10.1002/hbm.25122), 2020-07-08
Supplement: HBM-41-4232-s001.pdf [file HBM-41-4232-s001.pdf]

This document contains the **Siemens 3T MRI** (pages 2-3) and **Philips 3T MRI** (pages 4-7) protocol settings, which are specific for the study protocol within the traveling heads study performed in scope of the NISCI trial (<http://nisci-2020.eu/>). To keep it shorter, we deleted parameters, which does not differ from standard settings (as far as we knew) and which are redundant within standard PDF printouts.

Here's the complete list of protocols to be set up and the acquisition scheme:

- rf\_map (B1 mapping)
- RF\_sens\_head and RF\_sens\_body (RF sensitivity mapping)
- MPM\_T1 (multi-echo MPM)
- MPM\_PD (multi-echo MPM)
- MPM\_MT (multi-echo MPM)

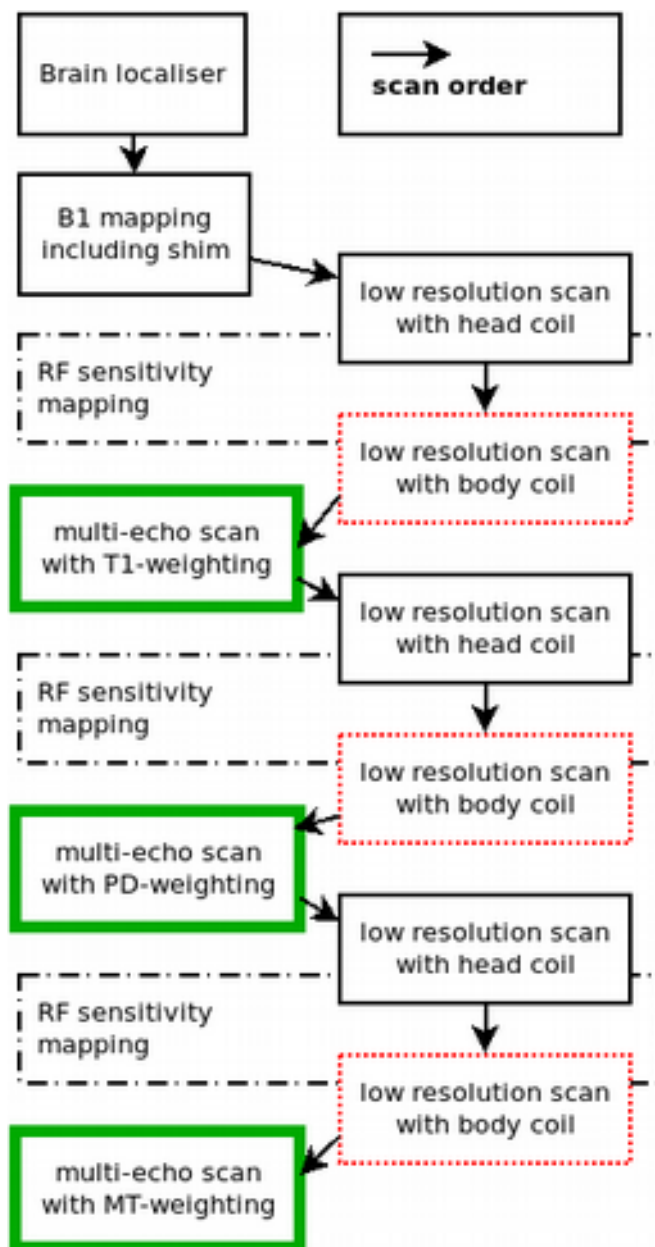

rf\_map TA:2:14 Voxel size:4.0x4.0x5.0 mm

Source protocol: Siemens\SequenceRegion\ServiceSequences\DefaultProtocols\rf\_map

|                 |             |                   |          |
|-----------------|-------------|-------------------|----------|
| Routine         |             | Contrast          |          |
| Slices          | 18          | Flip angle 1      | 90 deg   |
| Dist. factor    | 100%        | Measurements      | 1        |
| Position        | Isocenter   | Resolution        |          |
| Orientation     | Sagittal    | Base resolution   | 64       |
| Phase enc. dir. | A >> P      | Phase resolution  | 100%     |
| FoV read        | 256 mm      | Image Filter      | Off      |
| FoV phase       | 100%        | Distortion Corr.  | Off      |
| Slice thickness | 5 mm        | Prescan Normalize | Off      |
| TR              | 2000 ms     | Normalize         | Off      |
| TE 1            | 14 ms       | B1 filter         | Off      |
| Averages        | 1           | Raw filter        | Off      |
| Filter          | None        | Elliptical filter | Off      |
| Coil elements   | {head_neck} | System            |          |
|                 |             | Shim mode         | Standard |

-----  
**RF\_sens\_head** TA:9.8 s PAT:Off Voxel size:4.0x4.0x4.0 mm

Source protocol: Siemens\head\library\\_3D\t1\_fl3d\_sag\_p4\_iso\_1.0

|                       |                  |                       |                |
|-----------------------|------------------|-----------------------|----------------|
| Routine               |                  | Prescan Normalize     | Off            |
| Nr. of slab groups    | 1                | Normalize             | Off            |
| Slabs                 | 1                | B1 filter             | Off            |
| Position              | Isocenter        | Raw filter            | Off            |
| Orientation           | Sagittal         | Elliptical filter     | Off            |
| Phase enc. dir.       | A >> P           | Slice resolution      | 100%           |
| Phase oversampling    | 0%               | Slice partial Fourier | Off            |
| Slice oversampling    | 0%               | Geometry              |                |
| FoV read              | 256 mm           | Nr. of slab groups    | 1              |
| FoV phase             | 87.50%           | Slabs                 | 1              |
| Slice thickness       | 4 mm             | Position              | Isocenter      |
| TR                    | 4.6 ms           | Phase enc. dir.       | A >> P         |
| TE                    | 2 ms             | Phase oversampling    | 0%             |
| Averages              | 1                | Slice oversampling    | 0%             |
| Concatenations        | 1                | Slices per slab       | 44             |
| Filter                | None             | System                |                |
| Coil elements         | {head_neck}      | Coil Combine Mode     | Sum of Squares |
| Contrast              |                  | Auto Coil Select      | Off            |
| MTC                   | Off              | Shim mode             | Standard       |
| Magn. preparation     | None             | Sequence              |                |
| Flip angle            | 6 deg            | Introduction          | On             |
| Fat suppr.            | None             | Dimension             | 3D             |
| Water suppr.          | None             | Elliptical scanning   | On             |
| SWI                   | Off              | Phase stabilisation   | Off            |
| Averaging mode        | Short term       | Averaging mode        | Short term     |
| Measurements          | 1                | Multi-slice mode      | Interleaved    |
| Reconstruction        | Magnitude        | Asymmetric echo       | Off            |
| Multiple series       | Each measurement | Contrasts             | 1              |
| Resolution            |                  | Bandwidth             | 480 Hz/Px      |
| Base resolution       | 64               | Flow comp.            | No             |
| Phase resolution      | 100%             | Allowed delay         | 0 s            |
| Phase partial Fourier | Off              | RF pulse type         | Fast           |
| Interpolation         | Off              | Gradient mode         | Normal         |
| PAT mode              | None             | Excitation            | Non-sel.       |
| Image Filter          | Off              | RF spoiling           | On             |
| Distortion Corr.      | Off              |                       |                |

-----  
**Rf\_sens\_body**

same as before, but coil elements = body  
-----

MPM protocol starting next page...

MPM\_T1 TA:3:50 PAT:2 Voxel size:1.0x1.0x1.0 mm

Source protocol: Siemens\head\library\\_3D\t1\_fl3d\_sag\_p4\_iso\_1.0

|                       |            |                       |                |
|-----------------------|------------|-----------------------|----------------|
| Routine               |            | Image Filter          | Off            |
| Nr. of slab groups    | 1          | Distortion Corr.      | Off            |
| Slabs                 | 1          | Accel. factor 3D      | 1              |
| Position              | Isocenter  | Mode                  | 3D             |
| Orientation           | Sagittal   | Unfiltered images     | On             |
| Phase enc. dir.       | A >> P     | Prescan Normalize     | On             |
| Phase oversampling    | 0%         | Normalize             | Off            |
| Slice oversampling    | 0%         | B1 filter             | Off            |
| FoV read              | 256 mm     | Raw filter            | Off            |
| FoV phase             | 87.50%     | Elliptical filter     | Off            |
| Slice thickness       | 1 mm       | Slice resolution      | 91%            |
| TR                    | 18.0 ms    | Slice partial Fourier | 6/8            |
| TE 1                  | 2.46 ms    | Geometry              |                |
| TE 2                  | 4.92 ms    | Nr. of slab groups    | 1              |
| TE 3                  | 7.38 ms    | Slabs                 | 1              |
| TE 4                  | 9.84 ms    | Dist. factor          | 20%            |
| TE 5                  | 12.30 ms   | Position              | Isocenter      |
| TE 6                  | 14.76 ms   | Phase enc. dir.       | A >> P         |
| Averages              | 1          | Phase oversampling    | 0%             |
| Concatenations        | 1          | Slice oversampling    | 0%             |
| Filter                | Distortion | Slices per slab       | 176            |
| Corr.(3D)             |            | Multi-slice mode      | Interleaved    |
| Coil elements         | HEA;HEP    | Series                | Interleaved    |
| Contrast              |            | System                |                |
| MTC                   | Off        | Body                  | Off            |
| Magn. preparation     | None       | Save uncombined       | Off            |
| Flip angle            | 25 deg     | Coil Combine Mode     | Sum of Squares |
| Fat suppr.            | None       | Sequence              |                |
| Water suppr.          | None       | Introduction          | On             |
| SWI                   | Off        | Dimension             | 3D             |
| Averaging mode        | Short term | Elliptical scanning   | On             |
| Measurements          | 1          | Phase stabilisation   | Off            |
| Reconstruction        | Magnitude  | Averaging mode        | Short term     |
| Multiple series       | Each       | Multi-slice mode      | Interleaved    |
| measurement           |            | Asymmetric echo       | Off            |
| Resolution            |            | Contrasts             | 6              |
| Base resolution       | 256        | Bandwidth 1           | 480 Hz/Px      |
| Phase resolution      | 91%        | Flow comp. 1          | No             |
| Phase partial Fourier | Off        | Readout mode          | Bipolar        |
| Interpolation         | Off        | Allowed delay         | 0 s            |
| PAT mode              | GRAPPA     | RF pulse type         | Fast           |
| Accel. factor PE      | 2          | Gradient mode         | Normal         |
| Ref. lines PE         | 24         | Excitation            | Non-sel.       |
| Reference scan mode   | Integrated | RF spoiling           | On             |

-----  
MPM\_PD TA:3:50 PAT:2 Voxel size:1.0x1.0x1.0 mm

same as T1, but Flip angle = 4 deg  
-----

MPM\_MT TA:7:52 PAT:2 Voxel size:1.0x1.0x1.0 mm

same as T1/PD, but TR = 37.0 ms, Flip angle = 6 deg, MTC = On (Contrast Card)  
-----

Philips protocol parameters starting next page...

## B1 map

|                          |              |                            |                    |
|--------------------------|--------------|----------------------------|--------------------|
| SmartSelect              | yes          | TR                         | user defined       |
| Coil 1 (exclude)         | None         | (ms)                       | 30                 |
| Uniformity               | CLEAR        | Halfscan                   | no                 |
| FOV                      |              | Water-fat shift            | maximum            |
| FH (mm)                  | 256          | Shim                       | volume             |
| AP (mm)                  | 240          | ShimAlign                  | yes                |
| RL (mm)                  | 170          | mDIXON                     | no                 |
| ACQ voxel size           |              | Fat suppression            | no                 |
| FH (mm)                  | 4            | Water suppression          | no                 |
| AP (mm)                  | 4            | MTC                        | no                 |
| RL (mm)                  | 10           | Research prepulse          | no                 |
| Recon voxel size         |              | Diffusion mode             | no                 |
| FH (mm)                  | 1            | Multi-transmit             | no                 |
| AP (mm)                  | 1            | SAR mode                   | high               |
| RL (mm)                  | 5            | B1 mode                    | default            |
| Fold-over suppression    | no           | SAR allow first level      | yes                |
| Slice oversampling       | default      | PNS mode                   | high               |
| ENCASE enable            | no           | Gradient mode              | default            |
| Reconstruction matrix    | 256          | SoftTone mode              | no                 |
| SENSE                    | no           | Cardiac synchronization    | no                 |
| CS-SENSE                 | no           | Respiratory compensation   | no                 |
| Stacks                   | 1            | Navigator respiratory comp | no                 |
| slices                   | 34           | Flow compensation          | no                 |
| slice orientation        | sagittal     | fMRI echo stabilisation    | no                 |
| fold-over direction      | AP           | NSA                        | 1                  |
| fat shift direction      | F            | Angio / Contrast enh.      | no                 |
| Stack Offc.              |              | Quantitative flow          | no                 |
| AP (P=+mm)               | -24.0336266  | Manual start               | no                 |
| RL (L=+mm)               | 2.33173585   | Dynamic study              | no                 |
| FH (H=+mm)               | 17.2416954   | Preparation phases         | auto               |
| Ang.                     |              | Interactive F0             | select             |
| AP (deg)                 | -1.09899402  | B1 field map               | yes                |
| RL (deg)                 | 0.0476288982 | field map technique        | dual TR            |
| FH (deg)                 | 1.77370369   | TR extension               | 150                |
| Free rotatable           | no           | selective                  | yes                |
| Multi-chunk              | no           | grad spoil factor          | 10                 |
| Large table movement     | no           | MIP/MPR                    | no                 |
| PlanAlign                | no           | SWIp                       | no                 |
| REST slabs               | 0            | Images                     | M, (3) no          |
| Shim Size                |              | Autoview image             | M                  |
| AP (mm)                  | 199.917542   | Calculated images          | B1, (3) no         |
| RL (mm)                  | 190          | Reference tissue           | Grey matter        |
| FH (mm)                  | 225.881744   | Recon compression          | No                 |
| Offc.                    |              | Preset window contrast     | soft               |
| AP (P=+mm)               | -24.7313118  | Reconstruction mode        | real time          |
| RL (L=+mm)               | 2.24584699   | Save raw data              | no                 |
| FH (H=+mm)               | 22.8373032   | Hardcopy protocol          | no                 |
| Ang.                     |              | Image filter               | system default     |
| AP (deg)                 | -1.09899402  | Geometry correction        | default            |
| RL (deg)                 | 0.0476288982 | Elliptical k-space shutter | default            |
| FH (deg)                 | 1.77370369   | IF_info_seperator          | 1634755923         |
| Patient position         | head first   | Research Options used      | 47                 |
| Patient body position    | head first   | Total scan duration        | 03:36.1            |
| Patient orientation      | supine       | Rel. SNR                   | 312.167328         |
| Patient body orientation | supine       | Act. TR/TE (ms)            | 30 / 2.2           |
| Scan type                | Imaging      | ACQ matrix M x P           | 64 x 60            |
| Scan mode                | 3D           | ACQ voxel MPS (mm)         | 4.00 / 4.00 / 10.0 |
| technique                | FFE          | REC voxel MPS (mm)         | 1.00 / 1.00 / 5.00 |
| Contrast enhancement     | T1           |                            |                    |
| Acquisition mode         | cartesian    |                            |                    |
| Fast Imaging mode        | none         |                            |                    |
| Echoes                   | 1            |                            |                    |
| partial echo             | no           |                            |                    |
| shifted echo             | no           |                            |                    |
| TE                       | shortest     |                            |                    |
| Flip angle (deg)         | 60           |                            |                    |

|                          |                     |             |                               |                |
|--------------------------|---------------------|-------------|-------------------------------|----------------|
| <b>RF_sens_head</b>      |                     |             | mDIXON                        | no             |
|                          |                     |             | Fat suppression               | no             |
| SmartSelect              | yes                 |             | Water suppression             | no             |
| Coil 1 (exclude)         | None                |             | MTC                           | no             |
| Uniformity               | CLEAR               |             | Research prepulse             | no             |
| FOV                      |                     |             | Diffusion mode                | no             |
|                          | FH (mm)             | 256         | Multi-transmit                | no             |
|                          | AP (mm)             | 240         | SAR mode                      | high           |
|                          | RL (mm)             | 176         | B1 mode                       | default        |
| ACQ voxel size           |                     |             | SAR allow first level         | yes            |
|                          | FH (mm)             | 4           | PNS mode                      | high           |
|                          | AP (mm)             | 4           | Gradient mode                 | maximum        |
|                          | RL (mm)             | 4           | SoftTone mode                 | no             |
| Recon voxel size         |                     |             | Cardiac synchronization       | no             |
|                          | FH (mm)             | 1           | Respiratory compensation      | no             |
|                          | AP (mm)             | 1           | Navigator respiratory comp    | no             |
|                          | RL (mm)             | 4           | Flow compensation             | no             |
| Fold-over suppression    | no                  |             | fMRI echo stabilisation       | no             |
| Slice oversampling       | no                  |             | NSA                           | 1              |
| ENCASE enable            | no                  |             | Angio / Contrast enh.         | no             |
| Reconstruction matrix    | 256                 |             | Quantitative flow             | no             |
| SENSE                    | no                  |             | Manual start                  | no             |
| CS-SENSE                 | no                  |             | Dynamic study                 | no             |
| Stacks                   | 1                   |             | Preparation phases            | auto           |
|                          | slices              | 44          | Interactive F0                | no             |
|                          | slice orientation   | sagittal    | B1 field map                  | no             |
|                          | fold-over direction | AP          | MIP/MPR                       | no             |
|                          | fat shift direction | F           | SWIp                          | no             |
| Multi-chunk              | no                  |             | Images                        | M, (3) no      |
| Large table movement     | no                  |             | Autoview image                | M              |
| PlanAlign                | no                  |             | Calculated images             | (4) no         |
| REST slabs               | 0                   |             | Reference tissue              | Grey matter    |
| Patient position         | head first          |             | Recon compression             | No             |
| Patient body position    | head first          |             | Preset window contrast        | soft           |
| Patient orientation      | supine              |             | Reconstruction mode           | immediate      |
| Patient body orientation | supine              |             | Save raw data                 | no             |
| Scan type                | Imaging             |             | Hardcopy protocol             | no             |
| Scan mode                | 3D                  |             | Image filter                  | system default |
|                          | technique           | FFE         | Uniformity correction         | no             |
| Contrast enhancement     | T1                  |             | Geometry correction           | default        |
| Acquisition mode         | cartesian           |             | Elliptical k-space shutter    | default        |
| Fast Imaging mode        | none                |             | IF_info_seperator             | 0              |
| Echoes                   | 1                   |             | Total scan duration           | 00:08.9        |
|                          | partial echo        | no          | Rel. SNR                      | 42.3680992     |
|                          | shifted echo        | no          | Act. TR/TE (ms)               | 4.6 / 2.0      |
| TE                       | user defined        |             | ACQ matrix M x P              | 64 x 60        |
|                          | (ms)                | 2           | ACQ voxel MPS (mm)            | 4.00/4.00/4.00 |
| Flip angle (deg)         | 6                   |             | REC voxel MPS (mm)            | 1.00/1.00/4.00 |
| TR                       | user defined        |             | Scan percentage (%)           | 100            |
|                          | (ms)                | 4.6         | Act. slice gap (mm)           | 0              |
| Halfscan                 | yes                 |             | Act. WFS (pix) / BW (Hz)      | 0.898 / 483.4  |
|                          | factor Y            | 0.625       | Min. WFS (pix) / Max. BW (Hz) | 0.082/5277.0   |
|                          | factor Z            | 1           | Min. TR/TE (ms)               | 4.0 / 1.54     |
| Water-fat shift          | user defined        |             |                               |                |
|                          | (pixels)            | 0.899999976 |                               |                |
| Shim                     | auto                |             |                               |                |

### RF\_sens\_body

same as RF\_sens\_head, except following settings:

|                |                    |
|----------------|--------------------|
| SmartSelect    | no                 |
| clinical modes | BODY_QUAD.Complete |
| Coil 1         | Q-Body             |

**MPM\_T1**

|                          |                     |                               |                |
|--------------------------|---------------------|-------------------------------|----------------|
| SmartSelect              | yes                 | factor Y                      | 0.625          |
| Coil 1 (exclude)         | None                | factor Z                      | 1              |
| Uniformity               | Synergy             | Water-fat shift               | user defined   |
| FOV                      |                     | (pixels)                      | 0.899999976    |
|                          | FH (mm)             | Shim                          | auto           |
|                          | AP (mm)             | mDIXON                        | no             |
|                          | RL (mm)             | Fat suppression               | no             |
| ACQ voxel size           | FH (mm)             | Water suppression             | no             |
|                          | AP (mm)             | MTC                           | no             |
|                          | RL (mm)             | Research prepulse             | no             |
| Recon voxel size         | FH (mm)             | Diffusion mode                | no             |
|                          | AP (mm)             | Multi-transmit                | no             |
|                          | RL (mm)             | SAR mode                      | high           |
| Fold-over suppression    | no                  | B1 mode                       | default        |
| Slice oversampling       | default             | SAR allow first level         | yes            |
| ENCASE enable            | no                  | PNS mode                      | high           |
| Reconstruction matrix    | 256                 | Gradient mode                 | maximum        |
| SENSE                    | yes                 | SofTone mode                  | no             |
|                          | P reduction (AP)    | Cardiac synchronization       | no             |
|                          | S reduction (RL)    | Respiratory compensation      | no             |
| CS-SENSE                 | no                  | Navigator respiratory comp    | no             |
| Stacks                   | 1                   | Flow compensation             | no             |
|                          | slices              | fMRI echo stabilisation       | no             |
|                          | slice orientation   | NSA                           | 1              |
|                          | fold-over direction | Angio / Contrast enh.         | no             |
|                          | fat shift direction | Quantitative flow             | no             |
| Stack Offc.              | AP (P=+mm)          | Manual start                  | no             |
|                          | RL (L=+mm)          | Dynamic study                 | no             |
|                          | FH (H=+mm)          | Preparation phases            | auto           |
|                          | Ang.                | Interactive F0                | no             |
|                          | AP (deg)            | B1 field map                  | no             |
|                          | RL (deg)            | MIP/MPR                       | no             |
|                          | FH (deg)            | SWIp                          | no             |
|                          | Free rotatable      | Images                        | M, (3) no      |
| Multi-chunk              | no                  | Autoview image                | M              |
| Large table movement     | no                  | Calculated images             | (4) no         |
| PlanAlign                | no                  | Reference tissue              | Grey matter    |
| REST slabs               | 0                   | Recon compression             | No             |
| Patient position         | head first          | Preset window contrast        | soft           |
| Patient body position    | head first          | Reconstruction mode           | immediate      |
| Patient orientation      | supine              | Save raw data                 | no             |
| Patient body orientation | supine              | Hardcopy protocol             | no             |
| Scan type                | Imaging             | Image filter                  | system default |
| Scan mode                | 3D                  | Uniformity correction         | no             |
|                          | technique           | Geometry correction           | default        |
| Contrast enhancement     | T1                  | Elliptical k-space shutter    | default        |
| Acquisition mode         | cartesian           | IF_info_seperator             | 0              |
| Fast Imaging mode        | none                | Total scan duration           | 03:37.4        |
| Echoes                   | 6                   | Rel. SNR                      | 2.27444863     |
|                          | partial echo        | Act. TR/TE1/delta TE (ms)     | 18 / 2.4 / 2.4 |
|                          | shifted echo        | ACQ matrix M x P              | 256 x 240      |
| TE first                 | user defined        | ACQ voxel MPS (mm)            | 1.00/1.00/1.00 |
|                          | (ms)                | REC voxel MPS (mm)            | 1.00/1.00/1.00 |
|                          | echospadding        | Scan percentage (%)           | 100            |
|                          | (ms)                | Act. slice gap (mm)           | 5.96E-08       |
|                          | flyback             | Act. WFS (pix) / BW (Hz)      | 0.907/478.7    |
| Flip angle (deg)         | 25                  | Min. WFS (pix) / Max. BW (Hz) | 0.329/1319.6   |
| TR                       | user defined        | Min. TR/TE1/delta TE (ms)     | 17 / 2.0 / 2.4 |
|                          | (ms)                |                               |                |
| Halfscan                 | yes                 |                               |                |

**MPM\_PD and MPM\_MT on next page...**

**MPM\_PD**

same as **MPM\_T1**, except following settings:

|                  |   |                     |         |
|------------------|---|---------------------|---------|
| Flip angle (deg) | 4 | Total scan duration | 03:37.4 |
|------------------|---|---------------------|---------|

**MPM\_MT**

same as **MPM\_T1**, except following settings:

|                  |                |                       |         |
|------------------|----------------|-----------------------|---------|
| Flip angle (deg) | 6              | Research Options used | 26      |
| TR               | user defined   | Total scan duration   | 09:39.8 |
| (ms)             | 48             |                       |         |
| MTC              | off res. multi |                       |         |
| nr repetitions   | 1              |                       |         |
| angle            | 220            |                       |         |
| duration         | 8              |                       |         |
| frequency        | 1000           |                       |         |
